# Supplementary material for: Tracking intramolecular energy redistribution dynamics in aryl halides: the effect of halide mass
Source: Royal Society of Chemistry journal article supplement (doi:10.1039/c8ra04979c), 2018-01-01
Supplement: c8ra04979c1.pdf [file c8ra04979c1.pdf]

## Supplementary Information

### **Tracking intramolecular energy redistribution dynamics in aryl halides: The effect of halide mass**

Xiaosong Liu,<sup>a</sup> Yunfei Song,<sup>b†</sup> Wei Zhang,<sup>a</sup> Gangbei Zhu,<sup>b</sup> Zhe Lv,<sup>a</sup> Weilong Liu,<sup>a</sup> and Yanqiang Yang<sup>a,b,\*</sup>

<sup>a</sup> Department of Physics, Harbin Institute of Technology, Harbin, China

<sup>b</sup> National Key Laboratory of Shock Wave and Detonation Physics, Institute of Fluid Physics, China Academy of Engineering Physics, Mianyang, China

| Molecule | Peak           | Frequencies of coupling modes /cm <sup>-1</sup> | Beat frequency/cm <sup>-1</sup> |
|----------|----------------|-------------------------------------------------|---------------------------------|
| F-Ph     | Q <sub>1</sub> | 3072 and 2373                                   | 701                             |
|          | Q <sub>2</sub> | 3084 and 2373                                   | 711                             |
|          | Q <sub>3</sub> | 3072 and 2525                                   | 547                             |
|          | Q <sub>4</sub> | 3084 and 2525                                   | 559                             |
| Cl-Ph    | Q <sub>1</sub> | 3052 and 2257                                   | 795                             |
|          | Q <sub>2</sub> | 3067 and 2257                                   | 810                             |
|          | Q <sub>3</sub> | 3052 and 2511                                   | 541                             |
|          | Q <sub>4</sub> | 3067 and 2511                                   | 556                             |
|          | Q <sub>5</sub> | 2257 and 2511                                   | 254                             |
| Br-Ph    | Q <sub>1</sub> | 3056 and 2229                                   | 827                             |
|          | Q <sub>2</sub> | 3065 and 2229                                   | 836                             |
|          | Q <sub>3</sub> | 3056 and 2509                                   | 547                             |
|          | Q <sub>4</sub> | 3065 and 2509                                   | 556                             |
|          | Q <sub>5</sub> | 2229 and 2509                                   | 280                             |
| I-Ph     | Q <sub>1</sub> | 3048 and 2216                                   | 832                             |
|          | Q <sub>2</sub> | 3070 and 2216                                   | 854                             |
|          | Q <sub>3</sub> | 3048 and 2504                                   | 544                             |
|          | Q <sub>4</sub> | 3070 and 2504                                   | 566                             |
|          | Q <sub>5</sub> | 2216 and 2504                                   | 288                             |

Table 1. Frequency differences between high frequency C-H stretching modes and combination bands of aryl halides. Vibrational energy flow from red-coded parent modes to blue-coded daughter modes and beat frequencies between parent modes and daughter modes are signed

| Molecule | peak           | Frequencies of coupling modes /cm <sup>-1</sup> | Beat frequency/cm <sup>-1</sup> |
|----------|----------------|-------------------------------------------------|---------------------------------|
| F-Ph     | Q <sub>1</sub> | 1457 and 1603                                   | 146                             |
|          | Q <sub>2</sub> | 1496 and 1596                                   | 100                             |
|          | Q <sub>3</sub> | 1496 and 1603                                   | 107                             |
| Cl-Ph    | Q <sub>1</sub> | 1443 and 1583                                   | 140                             |
|          | Q <sub>2</sub> | 1479 and 1583                                   | 104                             |
|          | Q <sub>3</sub> | 1443 and 1479                                   | 36                              |
| Br-Ph    | Q <sub>1</sub> | 1577 and 1263                                   | 314                             |
|          | Q <sub>2</sub> | 1319 and 1577                                   | 258                             |
|          | Q <sub>3</sub> | 1441 and 1263                                   | 178                             |
|          | Q <sub>4</sub> | 1441 and 1577                                   | 136                             |
|          | Q <sub>5</sub> | 1472 and 1577                                   | 105                             |
|          | Q <sub>6</sub> | 1441 and 1472                                   | 31                              |
| I-Ph     | Q <sub>1</sub> | 1469 and 1255                                   | 214                             |
|          | Q <sub>2</sub> | 1436 and 1255                                   | 181                             |
|          | Q <sub>3</sub> | 1436 and 1441                                   | 130                             |
|          | Q <sub>4</sub> | 1318 and 1436                                   | 118                             |
|          | Q <sub>5</sub> | 1469 and 1571                                   | 102                             |
|          | Q <sub>6</sub> | 1436 and 1469                                   | 33                              |

Table 2. Frequency differences between the C-C stretching modes and in-plane C-H deformations of aryl halides. Vibrational energy flow from red-coded parent modes to blue-coded daughter modes and beat frequencies between parent modes and daughter modes are signed

| Molecule | Peak            | Frequencies of coupling modes /cm <sup>-1</sup> | Beat frequency/cm <sup>-1</sup> |
|----------|-----------------|-------------------------------------------------|---------------------------------|
| F-Ph     | Q <sub>1</sub>  | 1010 and 1155                                   | 144                             |
|          | Q <sub>2</sub>  | 1010 and 1218                                   | 203                             |
|          | Q <sub>3</sub>  | 1024 and 1218                                   | 194                             |
|          | Q <sub>4</sub>  | 1457 and 1596                                   | 142                             |
|          | Q <sub>5</sub>  | 1496 and 1596                                   | 101                             |
|          | Q <sub>6</sub>  | 1496 and 1603                                   | 107                             |
| Cl-Ph    | Q <sub>1</sub>  | 1068 and 1443                                   | 374                             |
|          | Q <sub>2</sub>  | 1002 and 1322                                   | 326                             |
|          | Q <sub>3</sub>  | 965 and 1174                                    | 217                             |
|          | Q <sub>4</sub>  | 987 and 1157                                    | 177                             |
|          | Q <sub>5</sub>  | 1002 and 1157                                   | 148                             |
|          | Q <sub>6</sub>  | 1002 and 1083                                   | 77                              |
|          | Q <sub>7</sub>  | 1024 and 1068                                   | 40                              |
|          | Q <sub>8</sub>  | 1479 and 1583                                   | 96                              |
|          | Q <sub>9</sub>  | 1443 and 1479                                   | 33                              |
| Br-Ph    | Q <sub>1</sub>  | 1158 and 990                                    | 168                             |
|          | Q <sub>2</sub>  | 1020 and 1158                                   | 143                             |
|          | Q <sub>3</sub>  | 1071 and 963                                    | 100                             |
|          | Q <sub>4</sub>  | 1001 and 1068                                   | 69                              |
|          | Q <sub>5</sub>  | 1020 and 1001                                   | 27                              |
|          | Q <sub>6</sub>  | 1176 and 1441                                   | 270                             |
|          | Q <sub>7</sub>  | 1263 and 1441                                   | 74                              |
|          | Q <sub>8</sub>  | 1319 and 1577                                   | 147                             |
|          | Q <sub>9</sub>  | 1263 and 1319                                   | 59                              |
|          | Q <sub>10</sub> | 1441 and 1472                                   | 31                              |
| I-Ph     | Q <sub>1</sub>  | 1156 and 1571                                   | 406                             |
|          | Q <sub>2</sub>  | 1068 and 1436                                   | 368                             |
|          | Q <sub>3</sub>  | 1156 and 1469                                   | 315                             |
|          | Q <sub>4</sub>  | 1156 and 1436                                   | 283                             |
|          | Q <sub>5</sub>  | 1175 and 1436                                   | 252                             |
|          | Q <sub>6</sub>  | 1156 and 1318                                   | 172                             |
|          | Q <sub>7</sub>  | 999 and 1156                                    | 159                             |
|          | Q <sub>8</sub>  | 1175 and 1318                                   | 140                             |
|          | Q <sub>9</sub>  | 1318 and 1436                                   | 117                             |
|          | Q <sub>10</sub> | 1175 and 1255                                   | 83                              |
|          | Q <sub>11</sub> | 1017 and 1060                                   | 36                              |

Table 3. Frequency differences between vibrational modes from 900 to 1600cm<sup>-1</sup> of aryl halides. Vibrational energy flow from red-coded parent modes to blue-coded daughter modes and beat frequencies between parent modes and daughter modes are signed

| Molecule | Peak            | Frequencies of coupling modes /cm <sup>-1</sup> | Beat frequency/cm <sup>-1</sup> |
|----------|-----------------|-------------------------------------------------|---------------------------------|
| F-Ph     | Q <sub>1</sub>  | 1218 and 900                                    | 318                             |
|          | Q <sub>2</sub>  | 1155 and 900                                    | 255                             |
|          | Q <sub>3</sub>  | 982 and 759                                     | 223                             |
|          | Q <sub>4</sub>  | 1010 and 831                                    | 179                             |
|          | Q <sub>5</sub>  | 1010 and 1155                                   | 145                             |
|          | Q <sub>6</sub>  | 955 and 807                                     | 148                             |
|          | Q <sub>7</sub>  | 1010 and 900                                    | 110                             |
|          | Q <sub>8</sub>  | 807 and 900                                     | 93                              |
|          | Q <sub>9</sub>  | 759 and 807                                     | 48                              |
|          | Q <sub>10</sub> | 1010 and 1068                                   | 58                              |
| Cl-Ph    | Q <sub>1</sub>  | 1024 and 741                                    | 283                             |
|          | Q <sub>2</sub>  | 1068 and 832                                    | 236                             |
|          | Q <sub>3</sub>  | 682 and 902                                     | 220                             |
|          | Q <sub>4</sub>  | 1002 and 902                                    | 100                             |
|          | Q <sub>5</sub>  | 702 and 832                                     | 132                             |
|          | Q <sub>6</sub>  | 1002 and 1083                                   | 81                              |
|          | Q <sub>7</sub>  | 1024 and 1068                                   | 44                              |
| Br-Ph    | Q <sub>1</sub>  | 1020 and 673                                    | 347                             |
|          | Q <sub>2</sub>  | 1001 and 673                                    | 328                             |
|          | Q <sub>3</sub>  | 681 and 906                                     | 225                             |
|          | Q <sub>4</sub>  | 737 and 906                                     | 169                             |
|          | Q <sub>5</sub>  | 990 and 906                                     | 84                              |
|          | Q <sub>6</sub>  | 1020 and 1068                                   | 48                              |
|          | Q <sub>7</sub>  | 1020 and 1071                                   | 51                              |
|          | Q <sub>8</sub>  | 1158 and 1176                                   | 18                              |
| I-Ph     | Q <sub>1</sub>  | 1255 and 904                                    | 321                             |
|          | Q <sub>2</sub>  | 1175 and 904                                    | 271                             |
|          | Q <sub>3</sub>  | 1068 and 1255                                   | 187                             |
|          | Q <sub>4</sub>  | 988 and 1156                                    | 168                             |
|          | Q <sub>5</sub>  | 654 and 838                                     | 184                             |
|          | Q <sub>6</sub>  | 1017 and 1156                                   | 139                             |
|          | Q <sub>7</sub>  | 1060 and 1175                                   | 115                             |
|          | Q <sub>8</sub>  | 1175 and 1255                                   | 80                              |
|          | Q <sub>9</sub>  | 999 and 1060                                    | 61                              |
|          | Q <sub>10</sub> | 684 and 731                                     | 47                              |

Table 4. Frequency differences between vibrational modes from 650 to 1200cm<sup>-1</sup> of aryl halides. Vibrational energy flow from red-coded parent modes to blue-coded daughter modes and beat frequencies between parent modes and daughter modes are signed

|                            |                            |                            |                            |                              |                             |
|----------------------------|----------------------------|----------------------------|----------------------------|------------------------------|-----------------------------|
| $B_2$ , 224                | $B_1$ , 396                | $A_2$ , 401                | $B_2$ , 498                | $A_1$ , 521                  | $B_1$ , $\alpha_{CCC}$ ,614 |
|                            |                            |                            |                            |                              |                             |
| $B_2$ , $\phi_{CC}$ ,675   | $B_2$ , $\gamma_{CH}$ ,750 | $A_1$ , $\nu_{CF}^2$ , 867 | $A_2$ , $\gamma_{CH}$ ,802 | $B_2$ , $\gamma_{CH}$ ,913   | $A_2$ , $\gamma_{CH}$ ,891  |
|                            |                            |                            |                            |                              |                             |
| $B_2$ , $\gamma_{CH}$ ,955 | $A_1$ , $\nu_{CCH}$ ,974   | $A_1$ , $\beta_{CH}$ ,997  | $B_1$ , $\beta_{CH}$ ,1067 | $A_1$ , $\delta_{CCH}$ ,1150 | $B_1$ , $\beta_{CH}$ ,1155  |
|                            |                            |                            |                            |                              |                             |
| $A_1$ , $\nu_{CF}^1$ ,1209 | $B_1$ , $\beta_{CH}$ ,1298 | $B_1$ , $\nu_{CC}$ ,1317   | $B_1$ , $\nu_{CC}$ ,1455   | $A_1$ , $\nu_{CC}$ ,1491     | $A_1$ , $\nu_{CC}$ ,1601    |
|                            |                            |                            |                            |                              |                             |
| $B_1$ , $\nu_{CC}$ ,1610   | $A_1$ , $\nu_{CH}$ ,3107   | $B_1$ , $\nu_{CH}$ ,3116   | $A_1$ , $\nu_{CH}$ ,3128   | $B_1$ , $\nu_{CH}$ ,3136,    | $A_1$ , $\nu_{CH}$ ,3137    |
|                            |                            |                            |                            |                              |                             |

Table 5. Vibrational symmetry type and vibrational structure of fluorobenzene(F-Ph), the nonharmonic vibrational frequencies of those normal modes are computed by density functional theory (DFT) with a Becke-Lee-Yang-Parr function (B3LYP) and the 6-311G basis set, as implemented in the Gaussian 03 computational package. Frequency units are  $\text{cm}^{-1}$

|                                     |                                     |                                       |                                     |                                      |                                      |
|-------------------------------------|-------------------------------------|---------------------------------------|-------------------------------------|--------------------------------------|--------------------------------------|
| B <sub>2</sub> , 183                | B <sub>1</sub> , 292                | A <sub>1</sub> , $\phi_{CC}$ ,405     | A <sub>2</sub> , 407                | B <sub>2</sub> , 471                 | B <sub>1</sub> , $\alpha_{CCC}$ ,614 |
|                                     |                                     |                                       |                                     |                                      |                                      |
| B <sub>2</sub> , $\phi_{CC}$ ,690   | A <sub>1</sub> , $\nu_{CCl^2}$ ,694 | B <sub>2</sub> , $\gamma_{CH}$ ,741   | A <sub>2</sub> , $\gamma_{CH}$ ,823 | B <sub>2</sub> , $\gamma_{CH}$ ,901  | A <sub>2</sub> , $\gamma_{CH}$ ,961  |
|                                     |                                     |                                       |                                     |                                      |                                      |
| B <sub>2</sub> , $\gamma_{CH}$ ,983 | A <sub>1</sub> , $\nu_{CCH}$ ,994   | A <sub>1</sub> , $\delta_{CCH}$ ,1020 | B <sub>1</sub> , $\beta_{CH}$ ,1073 | A <sub>1</sub> , $\nu_{CCl^1}$ ,1074 | B <sub>1</sub> , $\beta_{CH}$ ,1157  |
|                                     |                                     |                                       |                                     |                                      |                                      |
| A <sub>1</sub> , $\beta_{CH}$ ,1172 | B <sub>1</sub> , $\beta_{CH}$ ,1291 | B <sub>1</sub> , $\nu_{CC}$ ,1314     | B <sub>1</sub> , $\nu_{CC}$ ,1446   | A <sub>1</sub> , $\nu_{CC}$ ,1471    | A <sub>1</sub> , $\nu_{CC}$ ,1588    |
|                                     |                                     |                                       |                                     |                                      |                                      |
| B <sub>1</sub> , $\nu_{CC}$ ,1591   | A <sub>1</sub> , $\nu_{CH}$ ,3107   | B <sub>1</sub> , $\nu_{CH}$ ,3114     | A <sub>1</sub> , $\nu_{CH}$ ,3127   | B <sub>1</sub> , $\nu_{CH}$ ,3138    | A <sub>1</sub> , $\nu_{CH}$ ,3140    |
|                                     |                                     |                                       |                                     |                                      |                                      |

Table 6. Vibrational symmetry type and vibrational structure of chlorobenzene(Cl-Ph), the nonharmonic vibrational frequencies of those normal modes are computed by density functional theory (DFT) with a Becke-Lee-Yang-Parr function (B3LYP) and the 6-311G basis set, as implemented in the Gaussian 03 computational package. Frequency units are cm<sup>-1</sup>

|                                                                                   |                                                                                   |                                                                                   |                                      |                                     |                                      |
|-----------------------------------------------------------------------------------|-----------------------------------------------------------------------------------|-----------------------------------------------------------------------------------|--------------------------------------|-------------------------------------|--------------------------------------|
| B <sub>2</sub> ,163                                                               | B <sub>1</sub> ,245                                                               | A <sub>1</sub> ,306                                                               | A <sub>2</sub> , $\phi_{CC}$ ,405    | B <sub>2</sub> ,457                 | B <sub>1</sub> , $\alpha_{CCC}$ ,614 |
| 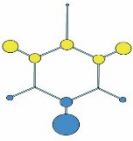 |  |  |                                      |                                     |                                      |
| A <sub>1</sub> , $\nu_{CBr^2}$ ,666                                               | B <sub>2</sub> , $\phi_{CC}$ ,683                                                 | B <sub>2</sub> , $\gamma_{CH}$ ,732                                               | A <sub>2</sub> , $\gamma_{CH}$ ,825  | B <sub>2</sub> , $\gamma_{CH}$ ,900 | A <sub>2</sub> , $\gamma_{CH}$ ,961  |
|                                                                                   |                                                                                   |                                                                                   |                                      |                                     |                                      |
| B <sub>2</sub> , $\gamma_{CH}$ ,983                                               | A <sub>1</sub> , $\nu_{CCH}$ ,993                                                 | A <sub>1</sub> , $\delta_{CCH}$ ,1015                                             | A <sub>1</sub> , $\nu_{CBr^1}$ ,1059 | B <sub>1</sub> , $\beta_{CH}$ ,1073 | B <sub>1</sub> , $\beta_{CH}$ ,1159  |
|                                                                                   |                                                                                   |  |                                      |                                     |                                      |
| A <sub>1</sub> , $\beta_{CH}$ ,1175                                               | B <sub>1</sub> , $\beta_{CH}$ ,1289                                               | B <sub>1</sub> , $\nu_{CC}$ ,1314                                                 | B <sub>1</sub> , $\nu_{CC}$ ,1442    | A <sub>1</sub> , $\nu_{CC}$ ,1473   | A <sub>1</sub> , $\nu_{CC}$ ,1582    |
|                                                                                   |                                                                                   |                                                                                   |                                      |                                     |                                      |
| B <sub>1</sub> , $\nu_{CC}$ ,1590                                                 | A <sub>1</sub> , $\nu_{CH}$ ,3105                                                 | B <sub>1</sub> , $\nu_{CH}$ ,3113                                                 | A <sub>1</sub> , $\nu_{CH}$ ,3126    | B <sub>1</sub> , $\nu_{CH}$ ,3137   | A <sub>1</sub> , $\nu_{CH}$ ,3139    |
|                                                                                   |                                                                                   |                                                                                   |                                      |                                     |                                      |

Table 7. Vibrational symmetry type and vibrational structure of bromobenzene(Br-Ph), the nonharmonic vibrational frequencies of those normal modes are computed by density functional theory (DFT) with a Becke-Lee-Yang-Parr function (B3LYP) and the 6-311G basis set, as implemented in the Gaussian 03 computational package. Frequency units are cm<sup>-1</sup>



|                                     |                                     |                                       |                                     |                                     |                                      |
|-------------------------------------|-------------------------------------|---------------------------------------|-------------------------------------|-------------------------------------|--------------------------------------|
| B <sub>2</sub> ,158                 | B <sub>1</sub> ,220                 | A <sub>1</sub> ,266                   | A <sub>2</sub> , $\phi_{CC}$ ,398   | B <sub>2</sub> ,450                 | B <sub>1</sub> , $\alpha_{CCC}$ ,613 |
|                                     |                                     |                                       |                                     |                                     |                                      |
| A <sub>1</sub> , $\nu_{Cl^2}$ ,654  | B <sub>2</sub> , $\phi_{CC}$ ,680   | B <sub>2</sub> , $\gamma_{CH}$ ,728   | A <sub>2</sub> , $\gamma_{CH}$ ,818 | B <sub>2</sub> , $\gamma_{CH}$ ,890 | A <sub>2</sub> , $\gamma_{CH}$ ,958  |
|                                     |                                     |                                       |                                     |                                     |                                      |
| B <sub>2</sub> , $\gamma_{CH}$ ,978 | A <sub>1</sub> , $\nu_{CCH}$ ,979   | A <sub>1</sub> , $\delta_{CCH}$ ,1011 | A <sub>1</sub> , $\nu_{Cl^1}$ ,1052 | B <sub>1</sub> , $\beta_{CH}$ ,1068 | B <sub>1</sub> , $\beta_{CH}$ ,1152  |
|                                     |                                     |                                       |                                     |                                     |                                      |
| A <sub>1</sub> , $\beta_{CH}$ ,1171 | B <sub>1</sub> , $\beta_{CH}$ ,1255 | B <sub>1</sub> , $\nu_{CC}$ ,1311     | B <sub>1</sub> , $\nu_{CC}$ ,1436   | A <sub>1</sub> , $\nu_{CC}$ ,1469   | A <sub>1</sub> , $\nu_{CC}$ ,1571    |
|                                     |                                     |                                       |                                     |                                     |                                      |
| B <sub>1</sub> , $\nu_{CC}$ ,1571   | A <sub>1</sub> , $\nu_{CH}$ ,3090   | B <sub>1</sub> , $\nu_{CH}$ ,3099     | A <sub>1</sub> , $\nu_{CH}$ ,3101   | B <sub>1</sub> , $\nu_{CH}$ ,3128   | A <sub>1</sub> , $\nu_{CH}$ ,3130    |
|                                     |                                     |                                       |                                     |                                     |                                      |

Table 8. Vibrational symmetry type and vibrational structure of iodobenzene (I-Ph), the nonharmonic vibrational frequencies of those normal modes are computed by the Moller-Plesset Perturbation Method (MP2) with the AUG-cc-pVTZ basis set on C, H atoms, and the AUG-cc-pVTZ-pp basis set on I atom, as implemented in the Gaussian 03 computational package. Frequency units are cm<sup>-1</sup>
